# Supplementary material for: Effect of two facile synthetic strategies with alterable polymerization sequence on the performance of N-vinyl carbazole-based conjugated porous materials
Source: Royal Society of Chemistry journal article supplement (doi:10.1039/c4ra11611a), 2014-11-05
Supplement: c4ra11611a1.pdf [file c4ra11611a1.pdf]

## Electronic Supplementary Information

### **Effect of Two Facile Synthetic Strategies with Alterable Polymerization Sequence on the Performance of *N*-vinyl Carbazole Based Conjugated Porous Materials**

Wei Huang,<sup>a,b</sup> Chuantao Gu,<sup>a,b</sup> Ting Wang,<sup>a</sup> Chunyang Gu,<sup>a,b</sup> Shanlin Qiao,<sup>\*a</sup> and Renqiang Yang<sup>\*a</sup>

<sup>a</sup>CAS Key Laboratory of Bio-based Materials, Qingdao Institute of Bioenergy and Bioprocess Technology, Chinese Academy of Sciences, Qingdao 266101, China

<sup>b</sup>University of Chinese Academy of Sciences, Beijing 100049, China

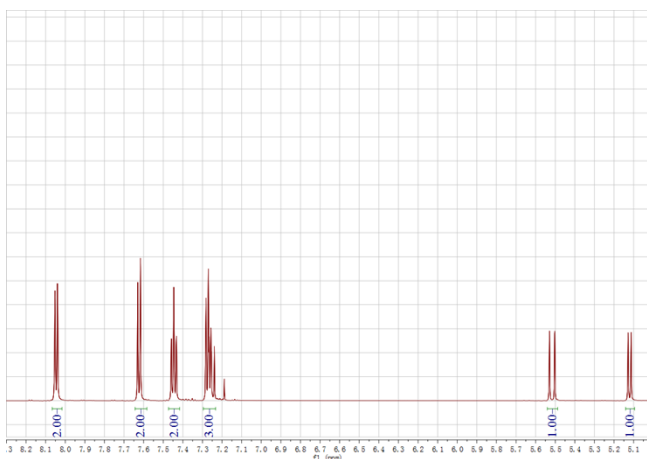

Fig. S1  $^1\text{H}$  NMR of *N*-vinyl carbazole (ppm).

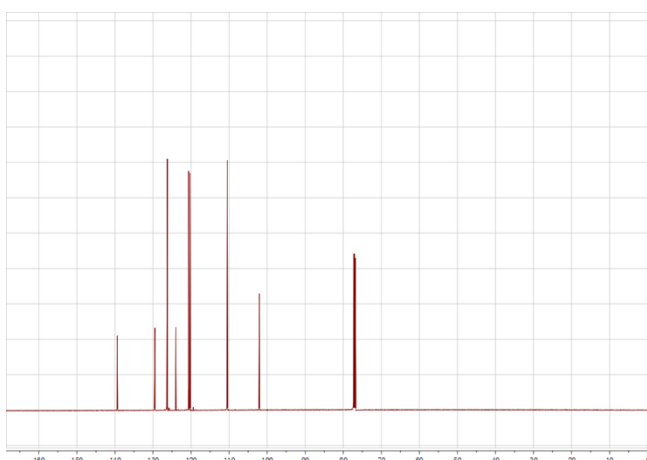

Fig. S2  $^{13}\text{C}$  NMR of *N*-vinyl carbazole (ppm).

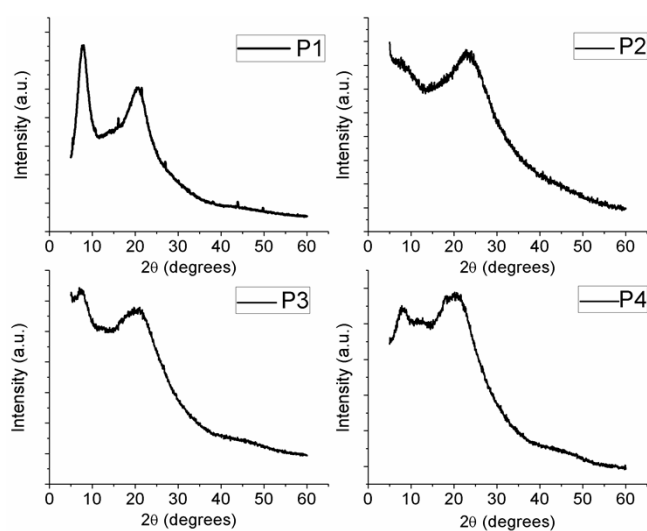

Fig. S3 P-XRD patterns of P1 to P4.

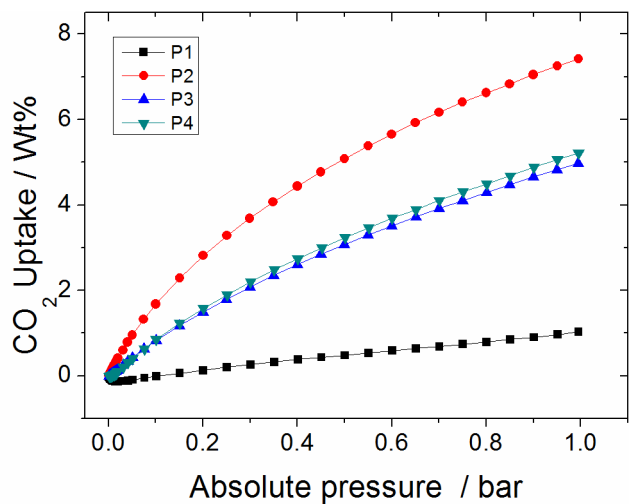

Fig. S4 CO<sub>2</sub> adsorption of polymers at 298 K.

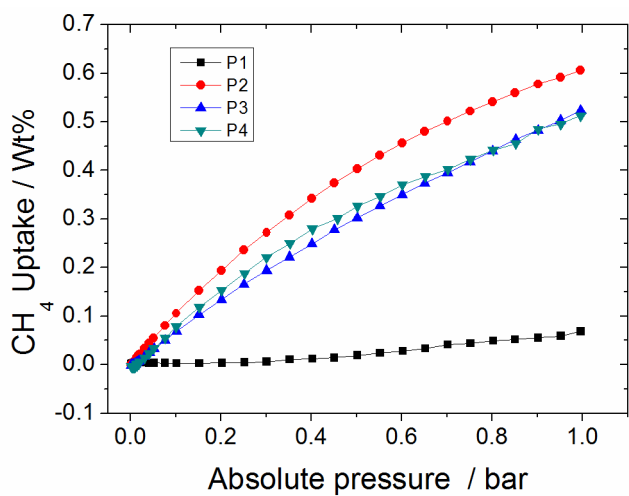

Fig. S5 CH<sub>4</sub> adsorption of polymers at 298 K.

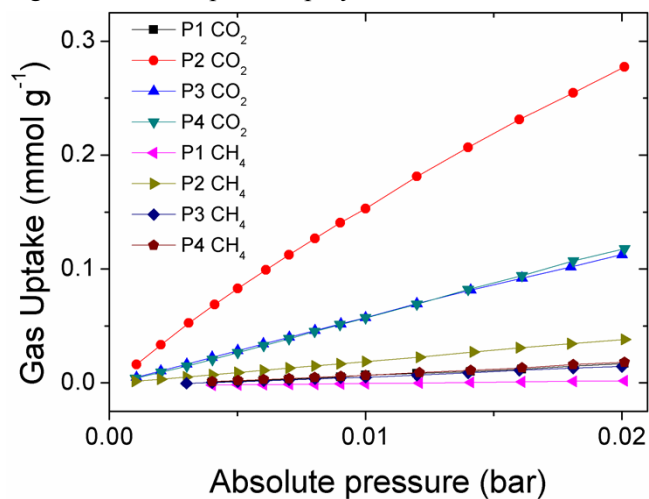

Fig. S6 Initial CO<sub>2</sub> and CH<sub>4</sub> uptake slopes of the P1 to P4 at 273 K.
